# Supplementary material
Source: PubMed Central journal article supplement (PMC1567674)

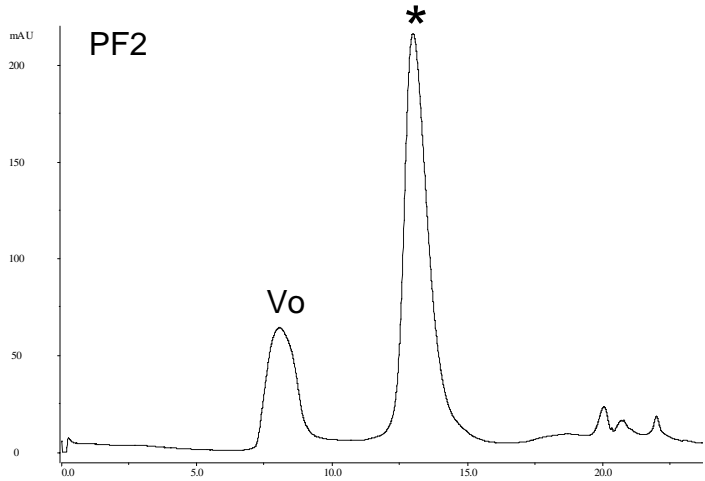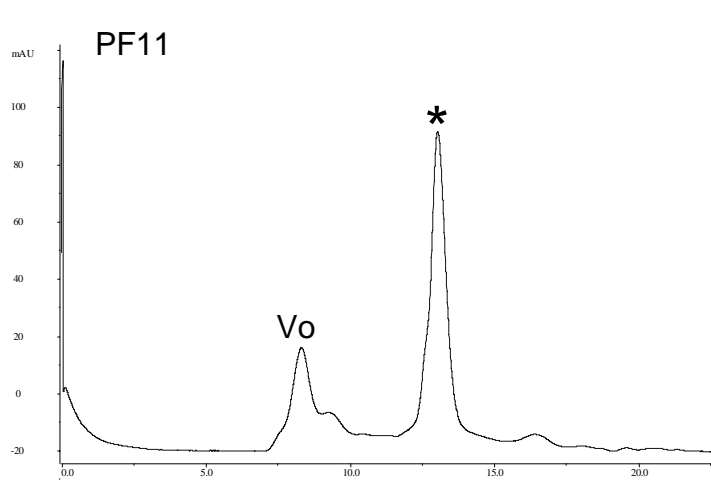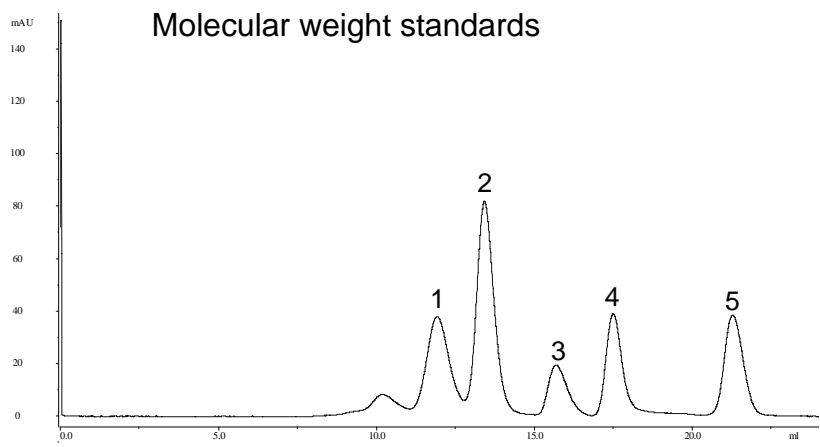

| Number | Sample          |
|--------|-----------------|
| 1      | IgG             |
| 2      | BSA             |
| 3      | B-lactoglobulin |
| 4      | Ribonuclease A  |
| 5      | Cytochrome C    |

Supplement: pnas_0601609103_1.pdf [file pnas_0601609103_1.pdf]

**A**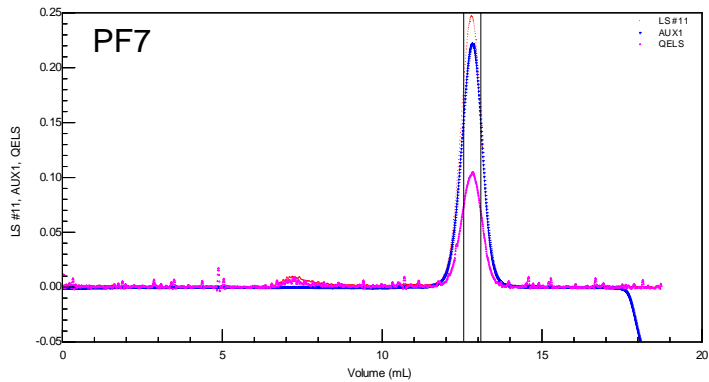**B**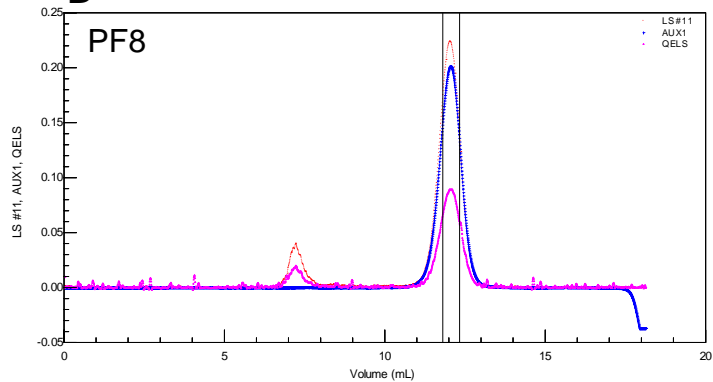**C**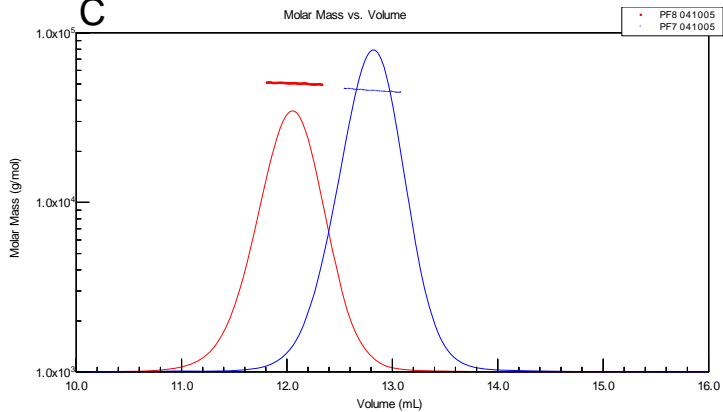

Supplement: pnas_0601609103_2.pdf [file pnas_0601609103_2.pdf]

A

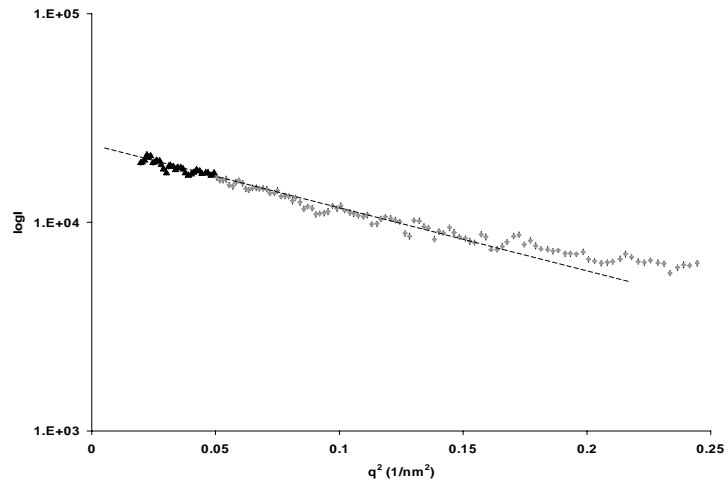

B

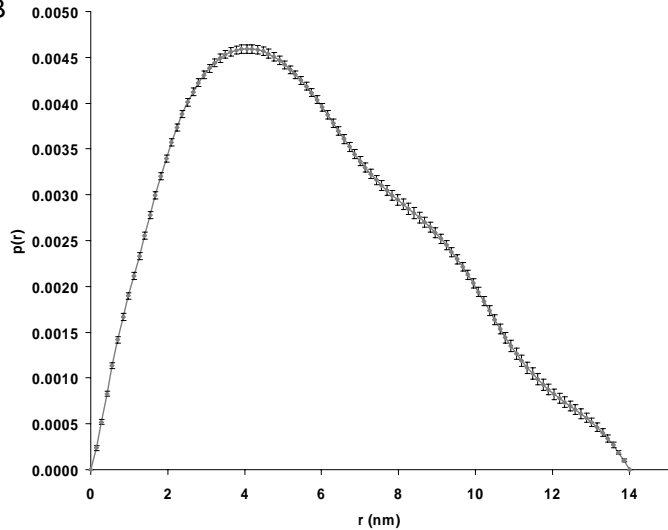

Supplement: pnas_0601609103_3.pdf [file pnas_0601609103_3.pdf]
